# Supplementary material
Source: PubMed Central journal article supplement (PMC9892227)
Supplement: NIHMS1852439-supplement-1.pdf [file NIHMS1852439-supplement-1.pdf]

# Effect Size Calculation (AOC)

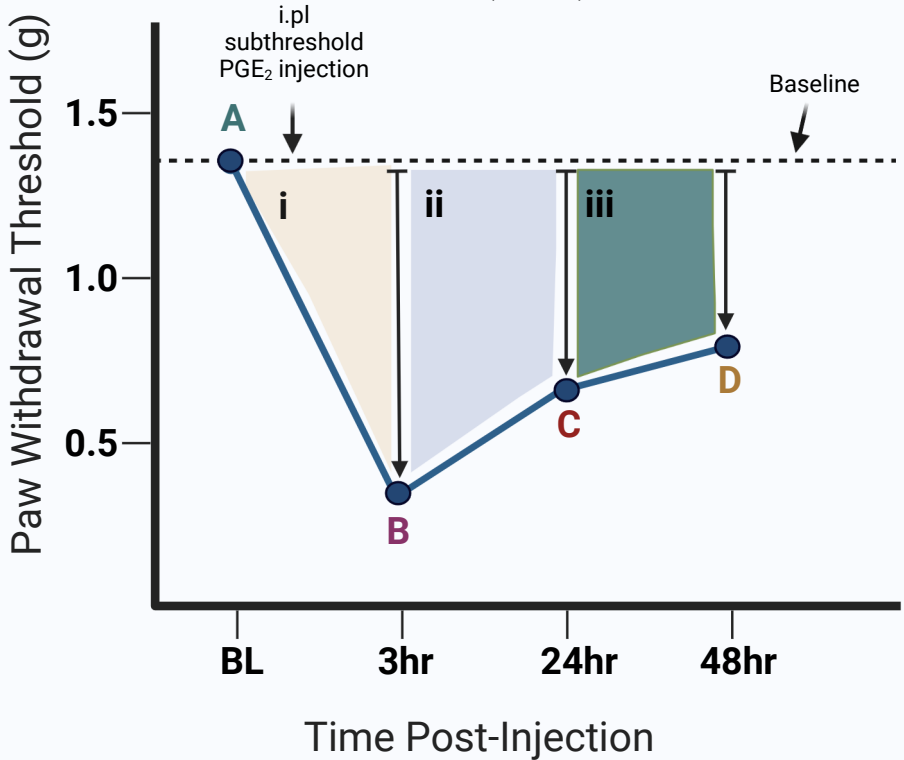

## Effect Size Calculation:

i =  $|A - B|$  = 3h Post-injection Effect Size

ii =  $|A - C|$  = 24h Post-injection Effect Size

iii =  $|A - D|$  = 48h Post-injection Effect Size

i + ii + iii = Cumulative Effect Size
